# Supplementary material for: Inactivation of Listeria and E. coli by Deep-UV LED: effect of substrate conditions on inactivation kinetics
Source: PubMed Central journal article supplement (PMC7042228; doi:10.1038/s41598-020-60459-8), 2020-02-25
Supplement: 41598_2020_60459_MOESM1_ESM.pdf [file 41598_2020_60459_MOESM1_ESM.pdf]

1 Supplementary Information

2 **Inactivation of *Listeria* and *E. coli* by Deep-UV LED:**  
3 **effect of substrate conditions on inactivation kinetics**

4  
5 *Authors:* Yifan Cheng<sup>1†</sup>, Hanyu Chen<sup>1†</sup>, Luis Alberto Sánchez Basurto<sup>2</sup>, Vladimir V. Protasenko<sup>3</sup>, Shyam  
6 Bharadwaj<sup>3</sup>, Moududul Islam<sup>3</sup>, Carmen I. Moraru<sup>1\*</sup>

7  
8 <sup>1</sup>Department of Food Science, Cornell University, Ithaca, NY 14850, U.S.A

9 <sup>2</sup>Universidad Autónoma de Querétaro, Santiago de Querétaro, México

10 <sup>3</sup>Electrical and Computer Engineering, Cornell University, Ithaca, NY 14850, U.S.A

11

12 \* Corresponding author. Email: [cim24@cornell.edu](mailto:cim24@cornell.edu)

13 † These authors contribute equally to this work

14

15

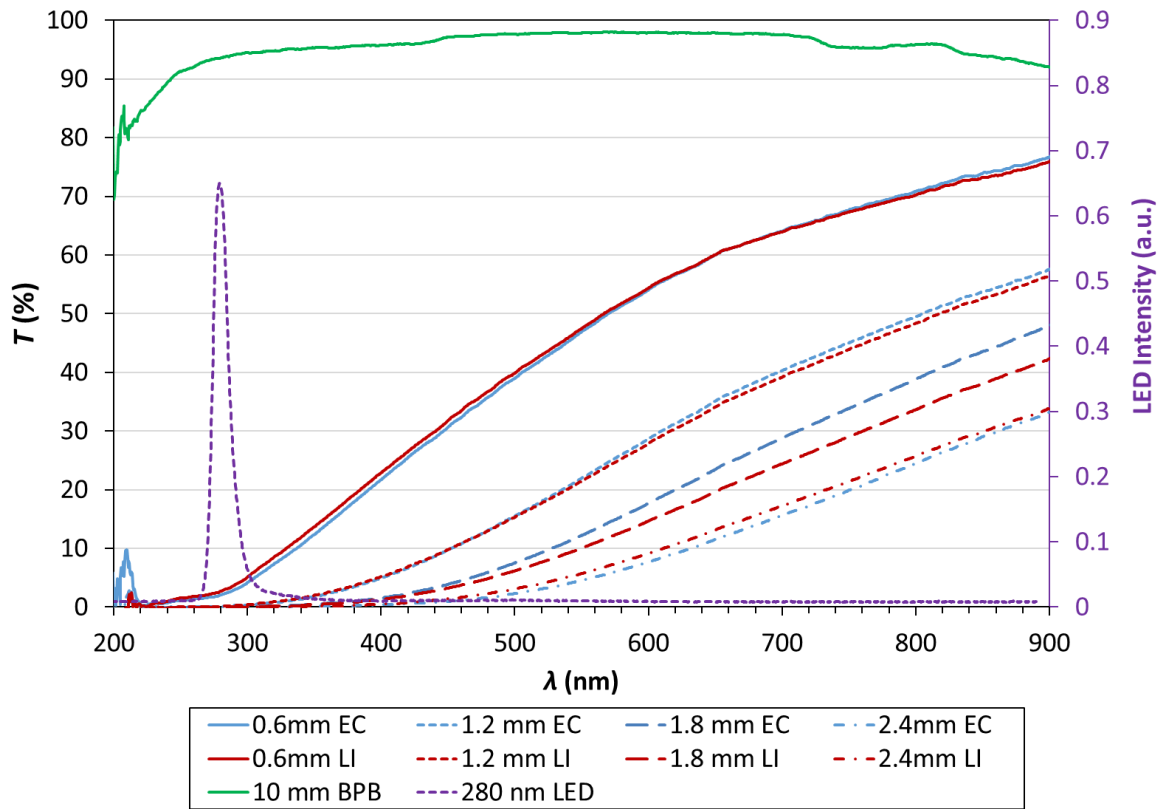

16

17 **Figure S1.** Full transmittance spectra of *E. coli* (EC, blue) and *L. innocua* (LI, red) suspensions of various  
 18 thickness, BPB medium, and the emission spectrum of the DUV LED used in this work.

19

20 **Table S1.** Summary of the bacterial cellular dimensions and contact angle values used in the  
 21 thermodynamic model

| Bacterial features                                  | Mean $\pm$ SD for indicated bacteria strains |                              | Reference |
|-----------------------------------------------------|----------------------------------------------|------------------------------|-----------|
|                                                     | <i>E. coli</i> ATCC 25922                    | <i>L. innocua</i> FSL C2-008 |           |
| Bacterial dimensions ( $\mu\text{m}$ ) <sup>a</sup> |                                              |                              |           |
| Length - <i>l</i>                                   | 2.22 $\pm$ 0.29                              | 1.26 $\pm$ 0.15              | [1]       |
| Radius - <i>R</i>                                   | 0.32 $\pm$ 0.02                              | 0.26 $\pm$ 0.02              |           |
| Contact angles ( $^{\circ}$ ) <sup>b</sup>          |                                              |                              |           |
| Water                                               | 40.3 $\pm$ 1.1                               | 46.5 $\pm$ 1.2               | [2]       |
| Glycerol                                            | 70.7 $\pm$ 2.1                               | 65.9 $\pm$ 2.3               |           |
| Diiodomethane                                       | 56.9 $\pm$ 3.0                               | 46.4 $\pm$ 1.7               |           |

22

23 <sup>a</sup> Bacterial dimensions were measured on calibrated SEM images of cells on silica substrates

24 <sup>b</sup> Contact angles were measured on bacterial cell lawns collected on filter paper

25

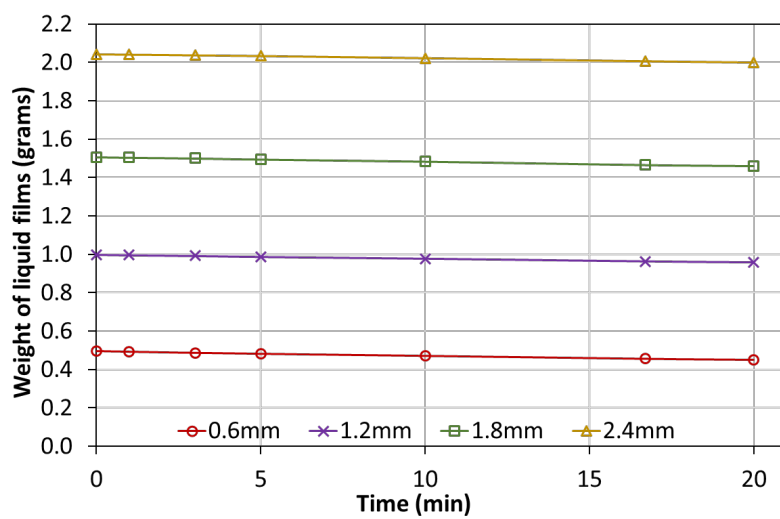

26

27 **Figure S2.** Evaporation of thin liquid films of various thickness monitored as weight loss over time.

28

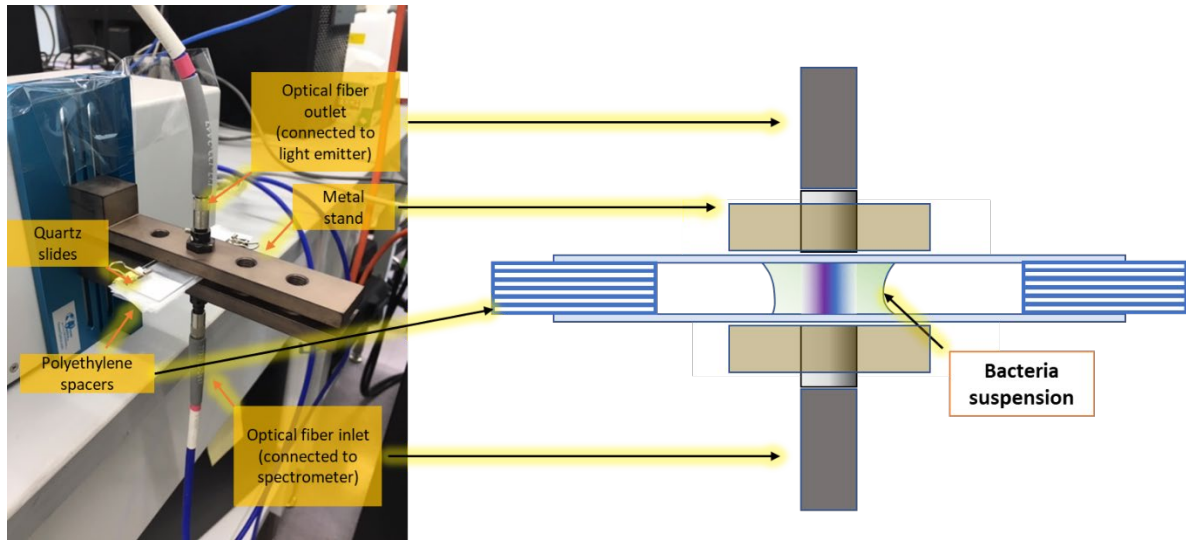

29

30 **Figure S3.** Photographic and schematics illustration of the experimental setup for measuring DUV  
31 transmittance. Thickness of the bacteria suspension was adjusted by changing the number of polyethylene  
32 spacers flanked by the quartz slides.

33

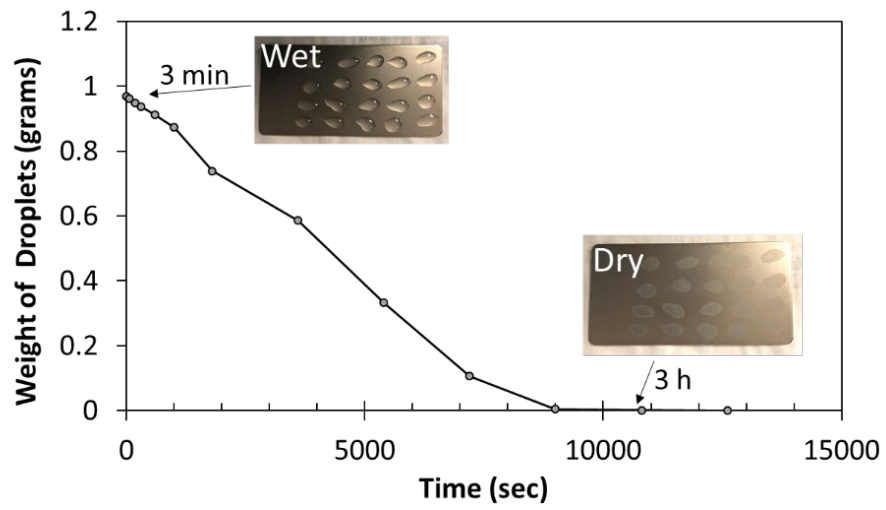

34

35 **Figure S4.** Kinetics of drying of the inoculated SS coupons and selection of the dry and the wet  
36 conditions used for the DUV LED inactivation experiments.

37

38 **References**

- 39 1. Hsu, L., Fang, J., Borca-Tasciuc, D., Worobo, R. & Moraru, C. I. The effect of micro- and  
40 nanoscale topography on the adhesion of bacterial cells to solid surfaces. *Appl. Environ. Microbiol.*  
41 (2013). doi:10.1128/AEM.03436-12
- 42 2. Feng, G. et al. Alumina surfaces with nanoscale topography reduce attachment and biofilm  
43 formation by *Escherichia coli* and *Listeria* spp. *Biofouling* 30, 1253–1268 (2014).

44
